# Supplementary material
Source: MDPI journal article supplement (https://www.mdpi.com/2072-4292/13/18/3785)
Supplement: s1 [file s1]

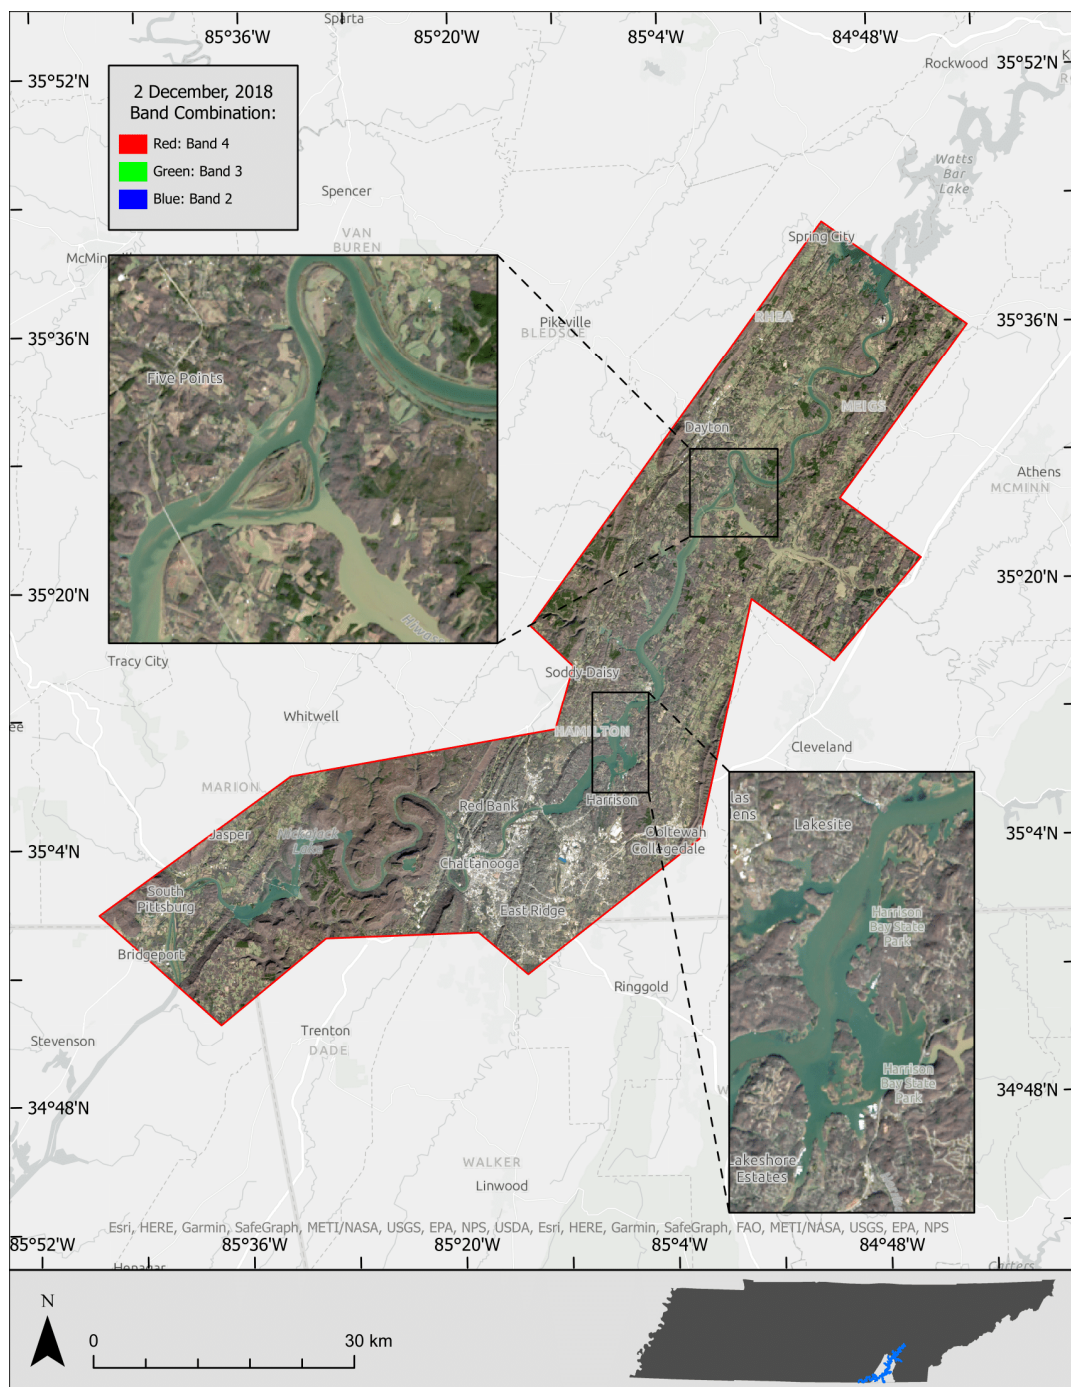

**Figure S1.** One of three Landsat 8 OLI images acquired over the study site on 2 December 2018. The image is subset to the study site extent displayed in true color. The inset regions represent areas of high turbidity variability due to the convergence of lakes and minor streams with the Tennessee River.

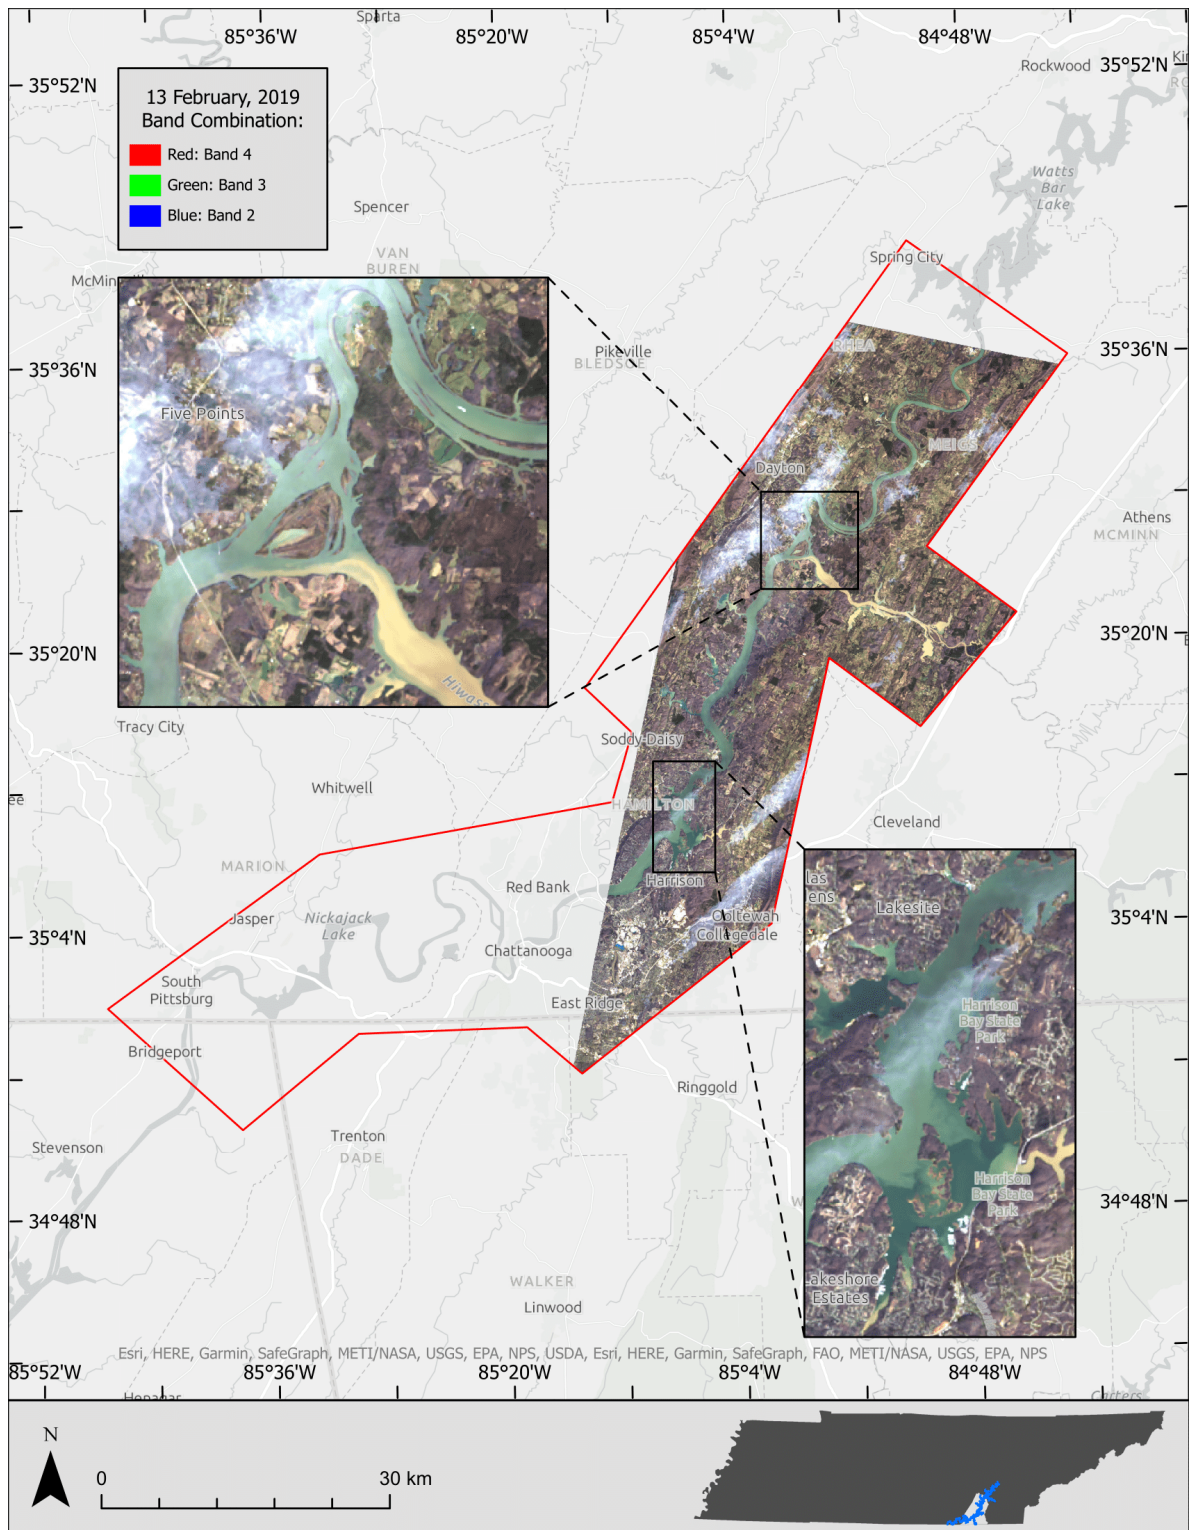

**Figure S2.** One of three Landsat 8 OLI images acquired over the study site on 13 February 2019. The image is subset to the study site extent displayed in true color. The inset regions represent areas of high turbidity variability due to the convergence of lakes and minor streams with the Tennessee River.



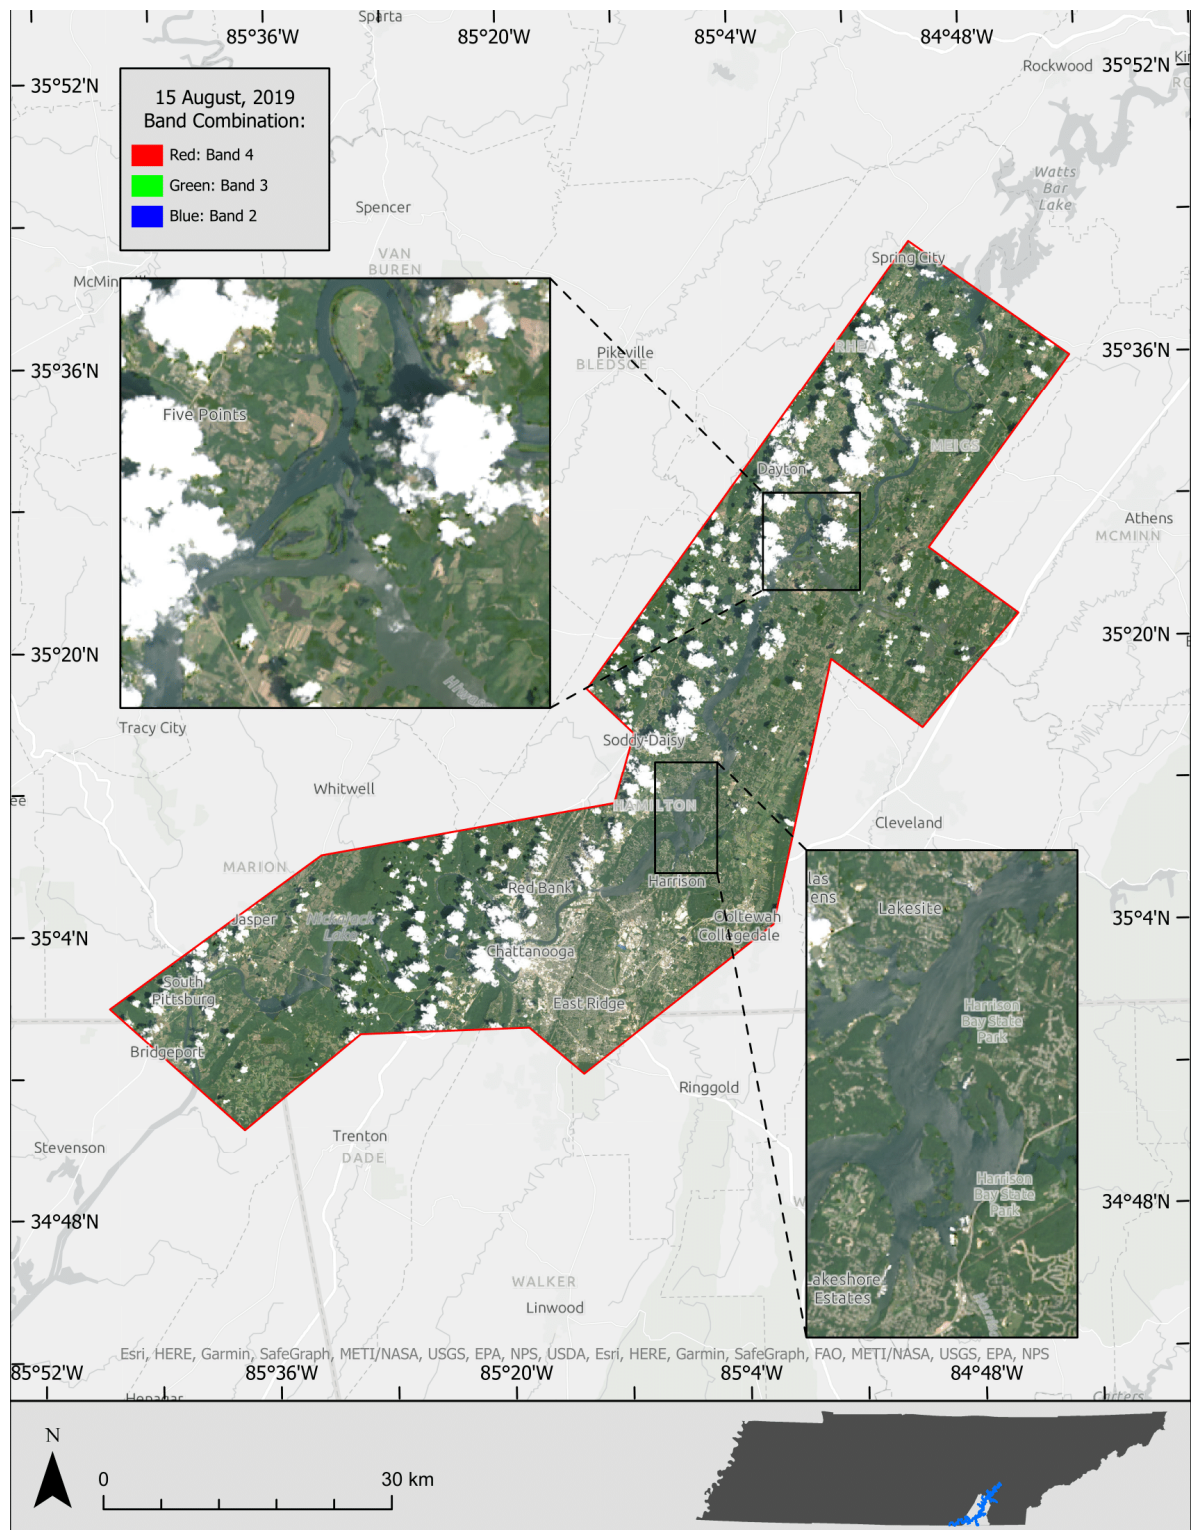

**Figure S3.** One of three Landsat 8 OLI images acquired over the study site on 15 August 2019. The image is subset to study site extent displayed in true color. The inset regions represent areas of high turbidity variability due to the convergence of lakes and minor streams with the Tennessee River.

**Table S1.** Model training data for 2 December 2018 image acquisition.

| Sample ID | Turbidity (NTU) | Surface Reflectance (%)<br>(Landsat 8 OLI) |        |        |        |        |        |        |
|-----------|-----------------|--------------------------------------------|--------|--------|--------|--------|--------|--------|
|           |                 | Band 1                                     | Band 2 | Band 3 | Band 4 | Band 5 | Band 6 | Band 7 |
| S01       | 3.40            | 1.97                                       | 2.76   | 4.54   | 3.04   | 2.00   | 1.74   | 1.24   |
| S02       | 4.60            | 2.03                                       | 3.00   | 4.79   | 3.25   | 2.12   | 1.77   | 1.30   |
| S03       | 4.40            | 1.78                                       | 2.75   | 4.75   | 3.67   | 2.96   | 2.11   | 1.59   |
| S04       | 4.90            | 1.86                                       | 2.74   | 4.51   | 3.03   | 1.51   | 1.27   | 0.89   |
| S05       | 2.70            | 1.50                                       | 2.05   | 3.40   | 2.91   | 4.46   | 4.04   | 2.46   |
| S06       | 2.90            | 1.62                                       | 2.60   | 4.24   | 2.68   | 1.71   | 1.49   | 1.05   |
| S07       | 3.20            | 1.56                                       | 2.38   | 4.06   | 2.56   | 1.58   | 1.37   | 1.01   |
| S09       | 5.90            | 1.83                                       | 2.67   | 4.56   | 3.06   | 1.48   | 1.20   | 0.98   |
| S10       | 3.80            | 2.84                                       | 3.77   | 5.56   | 4.83   | 7.21   | 7.67   | 5.06   |
| S11       | 4.20            | 1.86                                       | 2.78   | 4.66   | 3.21   | 2.20   | 1.97   | 1.42   |
| S12       | 16.20           | 2.04                                       | 2.97   | 5.32   | 4.37   | 2.31   | 1.88   | 1.33   |
| S14       | 4.00            | 1.59                                       | 2.49   | 4.36   | 2.88   | 1.71   | 1.42   | 1.10   |
| S18       | 17.00           | 3.32                                       | 4.79   | 9.48   | 7.94   | 2.61   | 1.87   | 1.33   |
| S19       | 18.80           | 3.27                                       | 4.75   | 9.09   | 7.51   | 2.56   | 1.79   | 1.30   |
| S20       | 36.80           | 3.47                                       | 5.08   | 9.95   | 9.54   | 3.19   | 1.48   | 1.03   |
| S21       | 8.80            | 3.28                                       | 4.68   | 8.83   | 7.02   | 2.29   | 1.66   | 1.24   |
| S22       | 3.70            | 2.09                                       | 3.24   | 5.17   | 3.26   | 1.93   | 1.66   | 1.26   |
| S24       | 3.80            | 1.67                                       | 2.59   | 4.39   | 2.84   | 1.55   | 1.28   | 1.00   |
| S26       | 2.30            | 1.29                                       | 1.97   | 3.13   | 2.22   | 1.60   | 1.43   | 1.05   |
| S27       | 3.00            | 1.56                                       | 2.31   | 3.91   | 2.50   | 1.62   | 1.40   | 1.02   |
| S28       | 3.20            | 1.53                                       | 2.30   | 3.72   | 2.82   | 2.24   | 2.12   | 1.48   |
| S31       | 4.00            | 1.53                                       | 2.47   | 4.25   | 2.74   | 1.48   | 1.37   | 0.98   |
| S32       | 2.90            | 1.50                                       | 2.45   | 4.00   | 2.43   | 1.62   | 1.33   | 1.04   |
| S33       | 2.70            | 1.44                                       | 2.19   | 3.51   | 2.33   | 1.68   | 1.57   | 1.24   |
| S35       | 3.70            | 1.57                                       | 2.54   | 4.10   | 2.58   | 1.54   | 1.36   | 1.04   |

**Table S2.** Model training data for 13 February 2019 image acquisition.

| Sample ID | Turbidity (NTU) | Surface Reflectance (%)<br>(Landsat 8 OLI) |        |        |        |        |        |        |
|-----------|-----------------|--------------------------------------------|--------|--------|--------|--------|--------|--------|
|           |                 | Band 1                                     | Band 2 | Band 3 | Band 4 | Band 5 | Band 6 | Band 7 |
| S01       | 15.65           | 4.41                                       | 5.34   | 8.93   | 7.22   | 1.16   | 0.33   | 0.24   |
| S02       | 18.84           | 4.29                                       | 5.19   | 8.40   | 6.40   | 1.02   | 0.27   | 0.21   |
| S03       | 4.70            | 3.10                                       | 3.53   | 4.85   | 2.77   | 0.71   | 0.38   | 0.30   |
| S04       | 5.14            | 3.22                                       | 3.62   | 5.13   | 3.16   | 0.86   | 0.55   | 0.33   |
| S06       | 9.12            | 3.92                                       | 4.66   | 6.81   | 4.33   | 0.96   | 0.61   | 0.44   |
| S08       | 12.72           | 3.91                                       | 4.85   | 7.39   | 5.08   | 0.91   | 0.36   | 0.24   |
| S09       | 12.82           | 4.03                                       | 5.06   | 7.63   | 5.54   | 0.98   | 0.43   | 0.32   |
| S11       | 5.32            | 3.99                                       | 4.88   | 7.37   | 4.93   | 0.82   | 0.36   | 0.22   |
| S12       | 5.06            | 3.23                                       | 3.70   | 5.02   | 2.67   | 0.62   | 0.29   | 0.21   |
| S13       | 4.76            | 3.34                                       | 3.86   | 5.50   | 3.13   | 0.64   | 0.26   | 0.19   |
| S14       | 5.42            | 3.34                                       | 3.91   | 5.48   | 3.13   | 0.61   | 0.27   | 0.15   |
| S15       | 5.40            | 3.31                                       | 3.76   | 5.16   | 2.83   | 0.59   | 0.28   | 0.19   |
| S16       | 7.32            | 3.88                                       | 4.71   | 7.31   | 5.08   | 0.83   | 0.27   | 0.17   |
| S17       | 5.26            | 4.31                                       | 5.23   | 8.52   | 6.48   | 1.00   | 0.25   | 0.17   |
| S18       | 12.68           | 4.72                                       | 5.83   | 9.87   | 8.88   | 1.38   | 0.25   | 0.20   |
| S19       | 44.38           | 4.69                                       | 5.95   | 10.11  | 9.52   | 1.54   | 0.30   | 0.19   |
| S21       | 69.40           | 5.00                                       | 6.32   | 11.26  | 12.72  | 2.66   | 0.47   | 0.32   |
| S22       | 78.78           | 5.05                                       | 6.45   | 11.66  | 13.82  | 3.23   | 0.77   | 0.52   |
| S23       | 90.22           | 5.22                                       | 6.51   | 11.44  | 13.60  | 3.29   | 0.69   | 0.52   |
| S24       | 81.66           | 5.58                                       | 6.78   | 11.26  | 13.02  | 3.96   | 1.69   | 1.26   |
| S25       | 71.98           | 5.49                                       | 6.48   | 10.92  | 12.18  | 3.71   | 2.11   | 1.55   |
| S28       | 87.06           | 5.86                                       | 7.21   | 11.84  | 14.65  | 4.76   | 1.09   | 0.80   |
| S29       | 107.02          | 5.60                                       | 7.04   | 11.95  | 15.07  | 4.57   | 0.93   | 0.64   |
| S30       | 85.86           | 5.17                                       | 6.41   | 11.38  | 14.10  | 3.87   | 0.80   | 0.59   |
| S31       | 75.06           | 5.73                                       | 6.92   | 11.12  | 13.43  | 4.40   | 1.50   | 1.29   |
| S32       | 65.06           | 5.72                                       | 6.87   | 11.24  | 13.88  | 4.87   | 1.88   | 1.40   |
| S34       | 40.84           | 7.95                                       | 8.64   | 12.30  | 12.99  | 6.73   | 4.84   | 3.82   |
| S36       | 90.67           | 6.28                                       | 7.48   | 12.02  | 14.62  | 5.41   | 2.48   | 2.01   |
| S37       | 74.02           | 6.03                                       | 7.18   | 11.84  | 14.01  | 4.85   | 2.40   | 1.82   |
| S38       | 71.08           | 7.25                                       | 8.16   | 12.53  | 14.26  | 6.28   | 4.28   | 3.41   |
| S39       | 93.60           | 5.88                                       | 7.18   | 11.52  | 13.85  | 4.33   | 1.15   | 0.89   |
| S40       | 64.64           | 5.61                                       | 6.83   | 11.74  | 13.58  | 3.91   | 1.10   | 0.90   |
| S41       | 61.60           | 4.96                                       | 6.35   | 11.02  | 11.71  | 2.66   | 0.78   | 0.54   |
